# Supplementary material for: Significantly (00l)-textured Ag2Se thin films with excellent thermoelectric performance for flexible power applications
Source: Royal Society of Chemistry journal article supplement (doi:10.1039/d2ta06356e), 2022-01-01
Supplement: d2ta06356e1.pdf [file d2ta06356e1.pdf]

## Supporting Information

### **Significantly (001)-textured Ag<sub>2</sub>Se thin films with excellent thermoelectric performance for flexible power applications**

*Zhuang-Hao Zheng,<sup>a</sup> Yi-Liu Li,<sup>a</sup> Jun-Yu Niu,<sup>a</sup> Meng Wei,<sup>a,\*</sup> Dong-Liang Zhang,<sup>a</sup> Yi-Ming Zhong,<sup>a</sup> Mohammad Nisar,<sup>a</sup> Adeel Abbas,<sup>a</sup> Shuo Chen,<sup>a</sup> Fu Li,<sup>a</sup> Guang-Xing Liang,<sup>a</sup> Ping Fan,<sup>a</sup> Yue-Xing Chen,<sup>a,\*</sup>*

<sup>a</sup> Shenzhen Key Laboratory of Advanced Thin Films and Applications, Key Laboratory of Optoelectronic Devices and Systems of Ministry of Education and Guangdong Province, College of Physics and Optoelectronic Engineering, Shenzhen University, Shenzhen 518060, P. R. China.

\* Corresponding author, Email: mengwei@szu.edu.cn and chenyx@szu.edu.cn

Table S1 Composition content and thickness of the thin films deposited at different temperature

|                             | 303  | 333  | 363  | 393  | 423  | 453  | 483  |
|-----------------------------|------|------|------|------|------|------|------|
| Deposition temperature (K)  | 303  | 333  | 363  | 393  | 423  | 453  | 483  |
| Se (at%)                    | 32.7 | 32.8 | 32.8 | 32.7 | 32.7 | 32.6 | 32.5 |
| Ag (at%)                    | 67.3 | 67.2 | 67.2 | 67.3 | 67.3 | 67.4 | 67.5 |
| Actual atomic ratio (Ag/Se) | 2.06 | 2.05 | 2.05 | 2.06 | 2.06 | 2.07 | 2.08 |
| Thickness (nm)              | 463  | 455  | 458  | 470  | 455  | 450  | 448  |

Table S2 Composition content and thickness of the thin films with different Ag and

|                              | Se content |       |       |       |       |       |
|------------------------------|------------|-------|-------|-------|-------|-------|
| Nominal atomic ratio (Ag/Se) | 1.94       | 1.96  | 1.98  | 2.00  | 2.02  | 2.04  |
| Se (at%)                     | 33.33      | 33.16 | 32.94 | 32.71 | 32.46 | 32.23 |
| Ag (at%)                     | 66.67      | 66.84 | 67.06 | 67.29 | 67.54 | 67.77 |
| Actual atomic ratio (Ag/Se)  | 2.00       | 2.02  | 2.04  | 2.06  | 2.08  | 2.10  |
| Thickness (nm)               | 455        | 450   | 460   | 457   | 450   | 455   |

Table S3 Room-temperature thermoelectric performance of *p*-type Sb<sub>2</sub>Te<sub>3</sub> thin films.

| Material                        | $\sigma$ (S cm <sup>-1</sup> ) | $S$ ( $\mu$ V K <sup>-1</sup> ) | $S^2\sigma$ ( $\mu$ W cm <sup>-1</sup> K <sup>-1</sup> ) |
|---------------------------------|--------------------------------|---------------------------------|----------------------------------------------------------|
| Sb <sub>2</sub> Te <sub>3</sub> | 513.6                          | 143.2                           | 10.5                                                     |

*P*-type Sb<sub>2</sub>Te<sub>3</sub> thin films were deposited on the flexible polyimide (PI) substrate by thermal evaporation method. The deposition power of the evaporation source for Sb<sub>2</sub>Te<sub>3</sub> powder was  $\sim 90$  W under a background vacuum pressure of  $3.0 \times 10^{-3}$  Pa. The deposition time of Sb<sub>2</sub>Te<sub>3</sub> was 15 mins with the thickness about 650 nm.

Table S4. Comparison of output power density  $\omega_{\text{out}}$  of the flexible devices among others

reports. Here PVP is abbreviated from polyvinylpyrrolidone, PPy is abbreviated from polypyrrole, NWs are abbreviated from nanowires, PEDOT:PSS is abbreviated from poly(3,4-ethylenedioxythiophene):poly(styrene sulfonate), PANI is abbreviated from polyaniline, and SWCNT is abbreviated from single-wall carbon nanotube.

| <i>p</i> -type Material                             | <i>n</i> -type Material          | Substrate         | Unit | $\Delta T$ (K) | $\omega_{out}$ (mW cm <sup>-2</sup> ) | Ref.      |
|-----------------------------------------------------|----------------------------------|-------------------|------|----------------|---------------------------------------|-----------|
| Sb <sub>2</sub> Te <sub>3</sub>                     | Ag <sub>2</sub> Se               | polyimide         | 8    | 50             | ~3.71                                 | This work |
| -                                                   | Ag <sub>2</sub> Se/Ag/Cu<br>AgSe | nylon<br>membrane | 6    | 45             | ~0.542                                | 1         |
| -                                                   | PVP/Ag <sub>2</sub> Se           | polyimide         | 6    | 29.1           | ~2.88                                 | 2         |
| -                                                   | Ag <sub>2</sub> Se/Se/PPy        | nylon<br>membrane | 6    | 34.1           | ~3.76                                 | 3         |
| Cu <sub>2</sub> Se NWs<br>+<br>PEDOT:PSS            | -                                | polyimide         | 9    | 30             | 0.091                                 | 4         |
| PANI/SWCN<br>T/Te                                   | -                                | -                 | 4    | 40             | 0.0624                                | 5         |
| Bi <sub>0.5</sub> Sb <sub>1.5</sub> Te <sub>3</sub> | Bi <sub>2</sub> Te <sub>3</sub>  | polyimide         | 3    | 40             | 0.8978                                | 6         |

The power density ( $P_D$ ) is calculated by  $P_D = \frac{P_{max}}{N \cdot A} = \frac{P_{max}}{N \cdot T \cdot w}$ ,<sup>4</sup> where  $N$ ,  $A$ , and  $l$  denotes the number, the length and the area of the legs,  $T$ ,  $w$  denote the thickness (450 nm for Ag<sub>2</sub>Se film, and 650 nm for Sb<sub>2</sub>Te<sub>3</sub> film) and the width (2.5 mm).

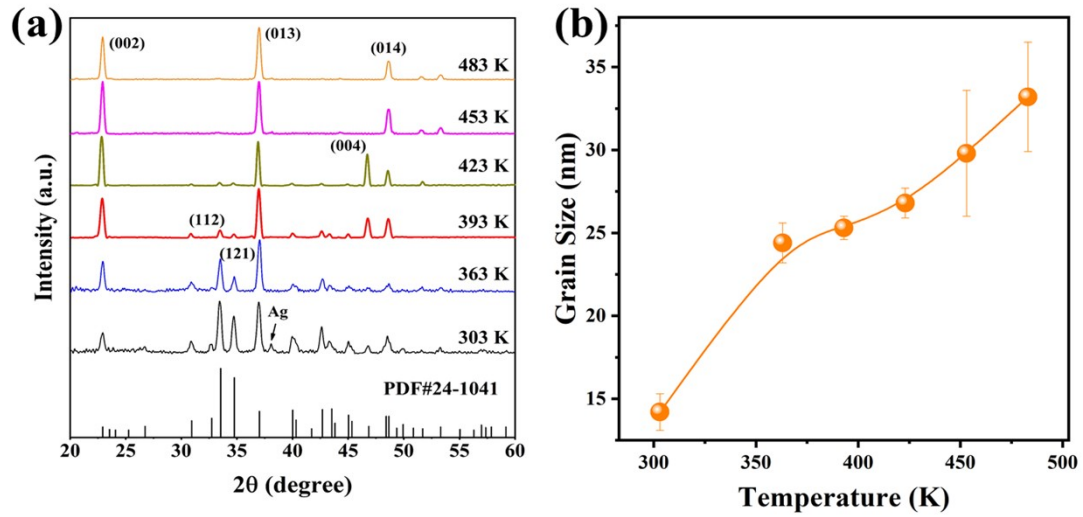

Fig. S1 (a) XRD patterns of thin films with different heat treatment temperature. (b)

The measurement result of the grain size of all the samples.

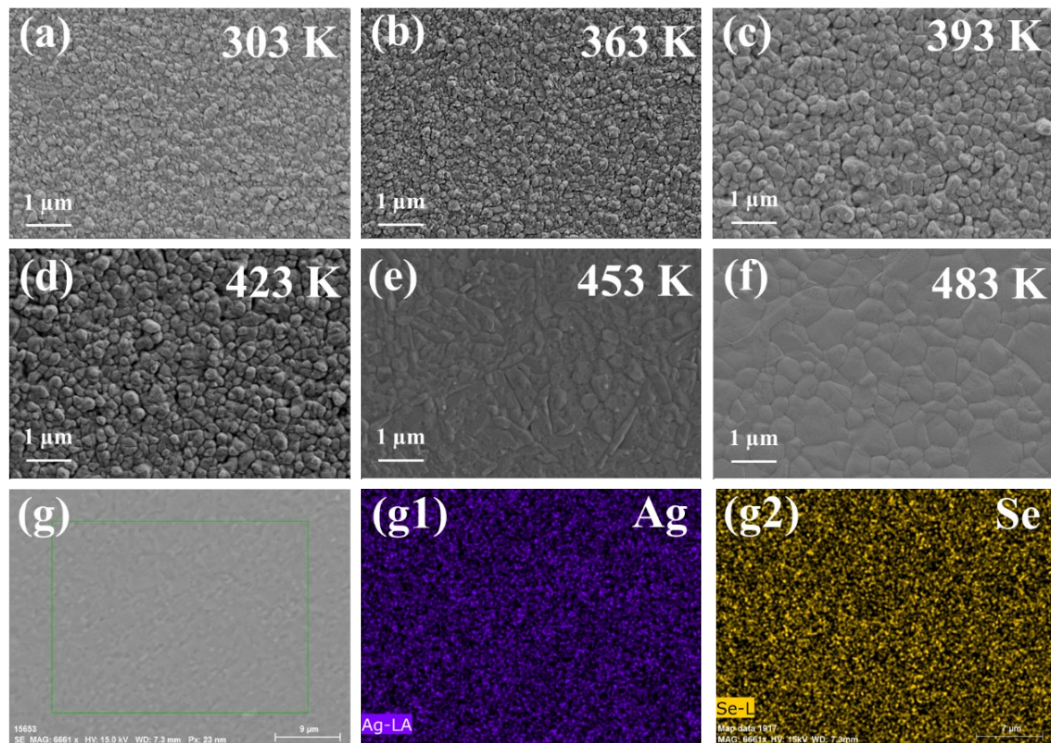

Fig. S2 SEM images of the  $\text{Ag}_2\text{Se}$  thin films at different growth temperature of (a) 303 K, (b) 363 K, (c) 393 K, (d) 423 K, (e) 453 K and (f) 483 K. (g-g2) EDS mapping for total elements and Ag/Se element of the 423 K -  $\text{Ag}_2\text{Se}$  thin film surface.

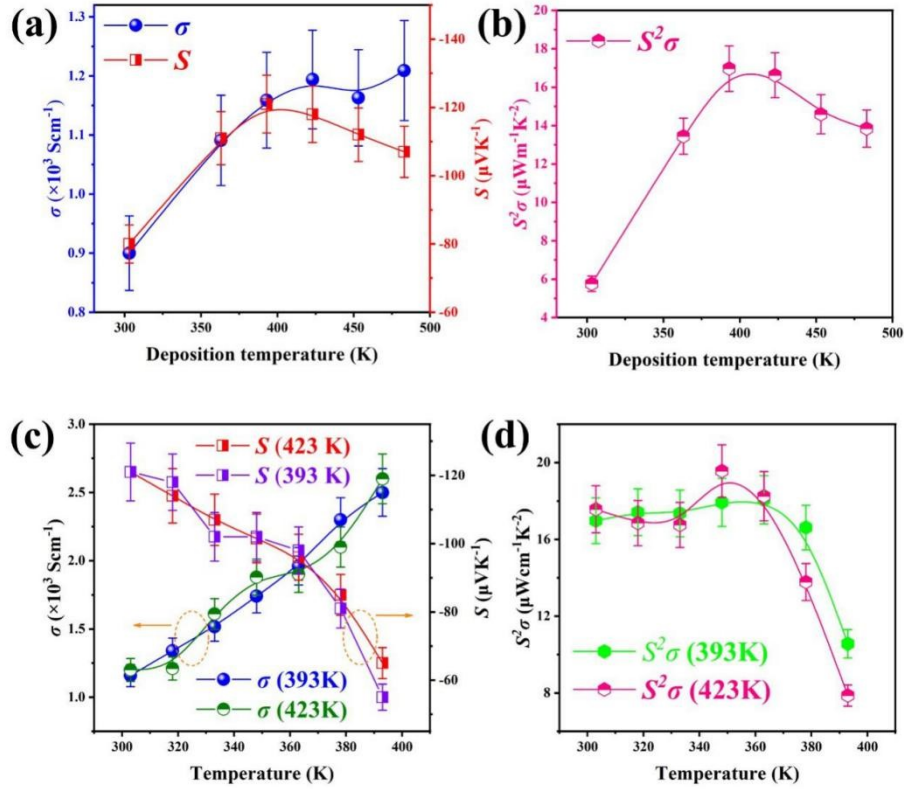

Fig. S3 (a) The deposition temperature-dependent  $\sigma$ ,  $S$  and (b)  $S^2\sigma$  (PF) of the samples at room temperature. (c) The variable test temperature-dependent  $\sigma$ ,  $S$  and (d)  $S^2\sigma$  (PF) of the samples deposited at 393 K and 423 K.

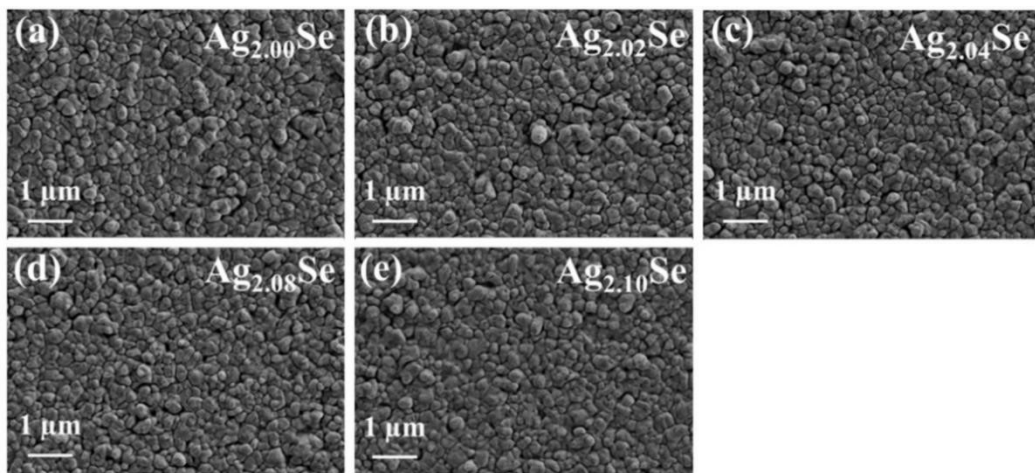

Fig. S4 SEM images of the Ag<sub>x</sub>Se thin films at different Ag content of (a) Ag<sub>2.00</sub>Se, (b) Ag<sub>2.02</sub>Se, (c) Ag<sub>2.04</sub>Se, (d) Ag<sub>2.08</sub>Se, and (e) Ag<sub>2.10</sub>Se.

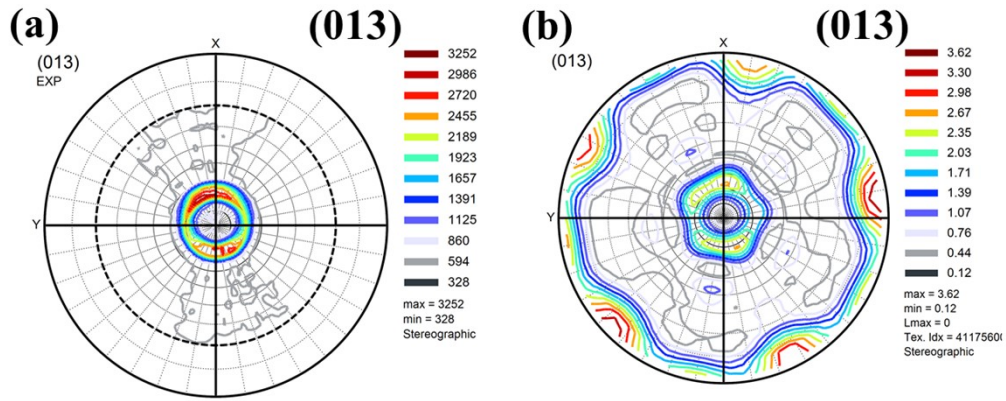

Fig. S5 (a) The (013) plane  $2\theta = 37.43^\circ$  X-ray pole figure of  $\text{Ag}_{2.02}\text{Se}$  for experiment result. (b) XRD polar figure of  $2\theta = 37.43^\circ$  with the result after ATEX analysis (Analysis Tools for Electron and X-ray diffraction).

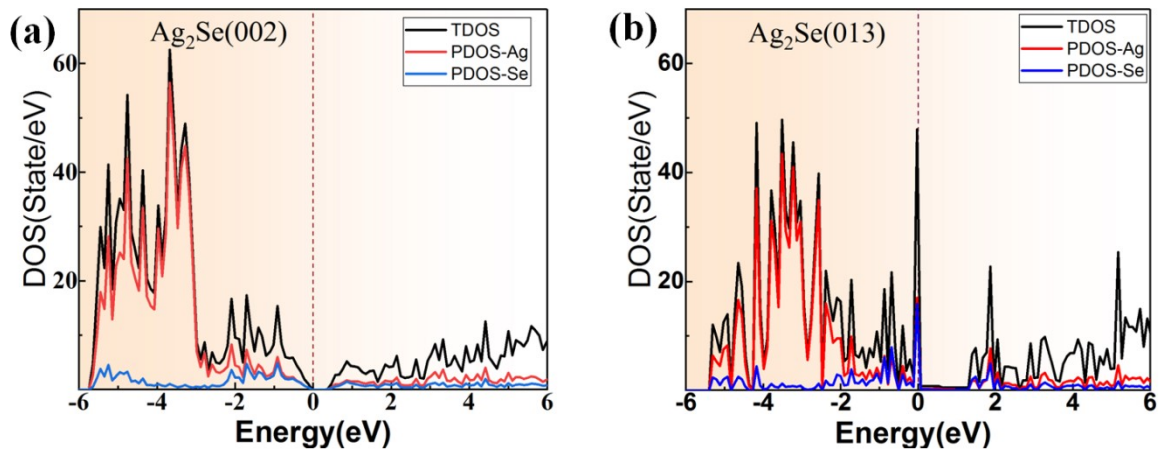

Fig. S6 Density of states of two selected crystallographic planes of (a) (002) and (b) (103).

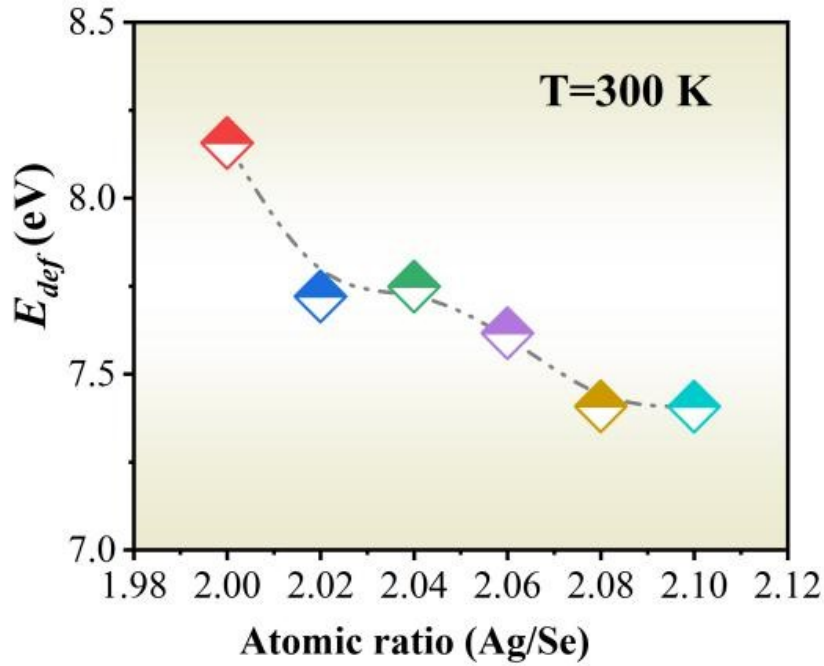

Fig. S7 The deformation potential  $E_{def}$  of  $Ag_2Se$  films with different Ag content.

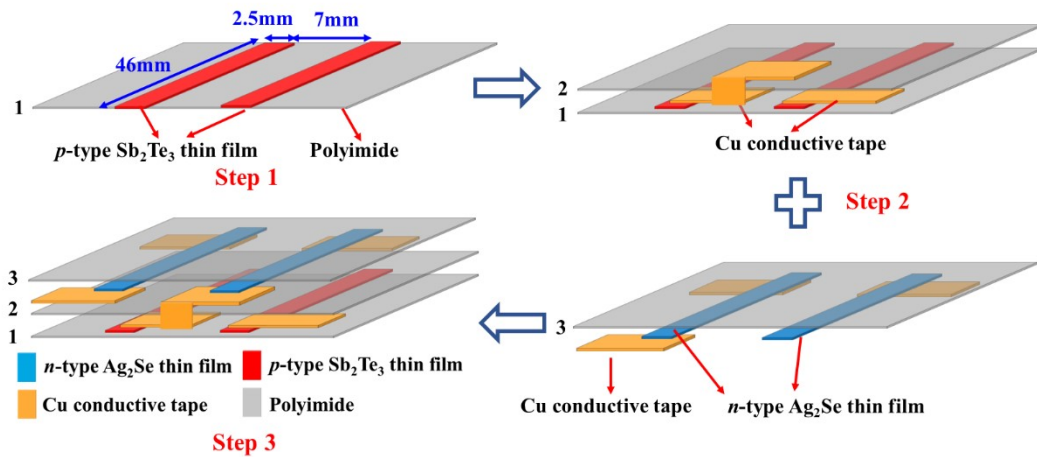

Fig. S8 Diagram of flexible device fabrication process.

It can be seen (Step 1 in Fig. S8) that the  $p$ -type  $Sb_2Te_3$  legs ( $2.5 \text{ mm} \times 46 \text{ mm}$ ) with the thickness about 650 nm are prepared on polyimide substrate. The distance between each leg is about 7 mm. The copper electrode tape is pasted on the  $n$ -legs at one end of the polyimide substrate marked as 1 and 2. Then,  $n$ -type  $Ag_2Se$  thin films with the thickness about 450 nm with same size were prepared on another flexible

substrate marked as 3 as shown in step 2. Finally, *n*-type leg and *p*-type leg were connected by copper electrode tape as shown in the step 3, and the prototype flexible device was finally made by eight *p-n* legs.

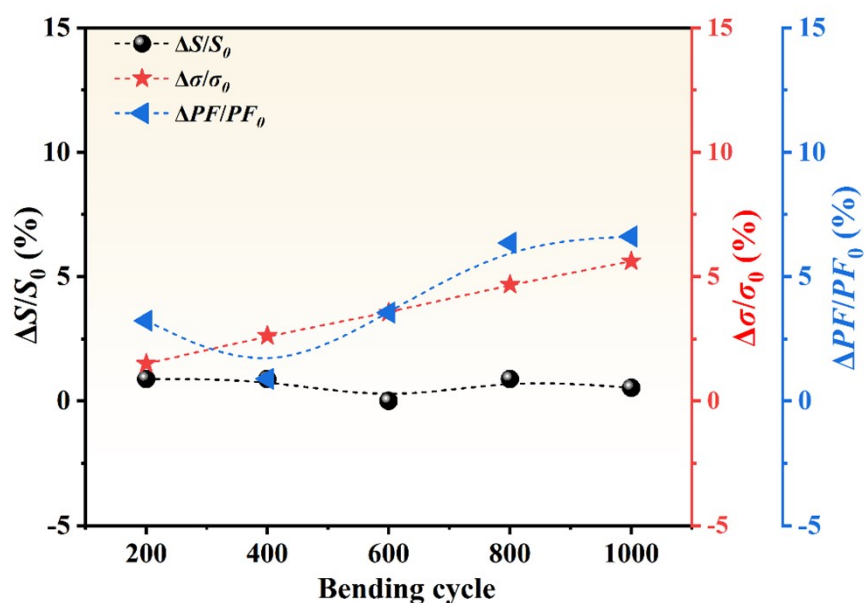

Fig. S9 The relative Seebeck coefficient change ( $\Delta S/S_0$ ), relative electrical conductivity change ( $\Delta \sigma/\sigma_0$ ), and relative power factor change ( $\Delta PF/PF_0$ ) as a function of bending cycle.

### Computational details:

Density functional theory (DFT) calculations were performed to investigate the electrical transport properties of  $Ag_2Se$  compound along two selected crystallographic planes of (002) and (103). The electronic properties such as the band structures and density of states (DOS) of  $Ag_2Se$  (001) and  $Ag_2Se$  (013) are achieved by using the



Vienna Ab Initio Simulation Package.<sup>7-9</sup> The calculations have been done by utilizing the plane-wave pseudopotential formalism. The ion-electron interaction is modeled with the help of the projector-augmented wave (PAW)<sup>10</sup> method for Ag and Se atoms. Cutoff energy for the wave function is set to 600 eV. The generalized gradient approximations (GGA)<sup>11</sup> with the Perdew-Burke-Ernzerhof potential (PBE)<sup>12</sup> are implemented for the exchange-correlation functional. The structures are relaxed until forces on each atom become less than  $0.10^{-5}$  eV/Å, and the criterion for energy convergence is set as  $1.0 \times 10^{-6}$  eV. Both the structures are modeled by  $2 \times 2 \times 2$  supercells containing 64 Ag and 32 Se sites. A Monkhorst-Pack  $k$ -point mesh of  $6 \times 4 \times 2$  is used, including  $\Gamma$ -points for the Brillouin zone sampling of the cell in the initial self-consistent field (SCF) step and increased to  $9 \times 6 \times 4$  for the DOS calculations. The electronic energy band is plotted based on a 150 k-points grid. The equations were shown below:<sup>13-17</sup>

$$s(\eta) = \frac{k_B}{e} \cdot \left[ \frac{\left(r + \frac{5}{2}\right) \cdot F_{r + \frac{3}{2}}(\eta)}{\left(r + \frac{3}{2}\right) \cdot F_{r + \frac{1}{2}}(\eta)} - \eta \right] \quad (S1)$$

$$n_H = \frac{1}{e \cdot R_H} = \frac{(2m^* \cdot k_B T)^{\frac{3}{2}}}{3\pi^2 \hbar^3} \cdot \left[ \frac{\left(r + \frac{3}{2}\right)^2 \cdot F_{r + \frac{1}{2}}^2(\eta)}{\left(2r + \frac{3}{2}\right) \cdot F_{r + \frac{1}{2}}(\eta)} \right] \quad (S2)$$

$$\mu_H = \left[ \frac{e\pi\hbar^4}{\sqrt{2}(k_B T)^{\frac{3}{2}} E_{def}^2 (m^*)^{\frac{5}{2}}} C_1 \right] \cdot \left[ \frac{\left(r + \frac{3}{2}\right) \cdot F_{2r + \frac{1}{2}}(\eta)}{\left(r + \frac{3}{2}\right)^2 \cdot F_{r + \frac{1}{2}}(\eta)} \right] \quad (S3)$$

$$L = \left(\frac{k_B}{e}\right)^2 \left\{ \frac{\left(r + \frac{7}{2}\right) \cdot F_{r + \frac{5}{2}}(\eta)}{\left(r + \frac{3}{2}\right) \cdot F_{r + \frac{1}{2}}(\eta)} - \left[ \frac{\left(r + \frac{5}{2}\right) \cdot F_{r + \frac{3}{2}}(\eta)}{\left(r + \frac{3}{2}\right) \cdot F_{r + \frac{1}{2}}(\eta)} \right]^2 \right\} \quad (S4)$$

where  $\eta$ ,  $k_B$ ,  $e$ ,  $r$ ,  $R_H$ ,  $m^*$ ,  $\hbar$ ,  $C_1$  and  $E_{def}$  are the reduced Fermi level, the Boltzmann constant, the electron charge, the carrier scattering factor ( $r = -1/2$  for acoustic phonon scattering), the Hall coefficient, the effective mass, the reduced Plank constant, the elastic constant for longitudinal vibrations and the deformation potential coefficient, respectively. Here  $C_1 = v_1^2 \cdot \rho$ , where  $v_1$  is the longitudinal sound velocity.  $F_i(\eta)$  is the Fermi integral and can be expressed as:

$$F_i(\eta) = \int_0^{\infty} \frac{x^i}{1 + e^{(x-\eta)}} dx \quad (S5)$$

Based on these simulations, we can plot the carrier concentration dependent  $m^*$ , and  $E_{def}$ .

Table: Magnitudes for standard values used in the calculations.

| Parameter                 | Symbol  | Magnitude                    |
|---------------------------|---------|------------------------------|
| Boltzmann constant        | $k_B$   | $1.38 \times 10^{-23} J/K$   |
| Electron charge           | $e$     | $1.6022 \times 10^{-19} C$   |
| Reduced Plank constant    | $\hbar$ | $1.0546 \times 10^{-34} J.s$ |
| Carrier scattering factor | $r$     | $-1/2$                       |

## References

1. Y. Lu, Y. Qiu, K. -F. Cai, Y. -F. Ding, M. -D, Wan, C. Jiang, Q. Yao, C. -J. Huang,

1. L. -D. Chen, and J. -Q. He Ultrahigh power factor and flexible silver selenide-based composite film for thermoelectric devices. *Energy Environ. Sci.* 2020, **13**, 1240-1249.
2. C. Jiang, P. Wei, Y. -F. Ding, K. -F. Cai, L. Tong, Q. Gao, Y. Lu, W. -Y. Zhao, and S. Chen, Ultrahigh performance polyvinylpyrrolidone/Ag<sub>2</sub>Se composite thermoelectric film for flexible energy harvesting. *Nano Energy*, 2021, **80**, 105488.
3. Y. -T. Li, Q. Lou, J. -M. Yang, K. -F. Cai, Y. Liu, Y. -M. Lu, Y. Qiu, Y. Lu, Z. -X. Wang, M. -M. Wu, J. -Q. He, and S. Shen, Exceptionally High Power Factor Ag<sub>2</sub>Se/Se/Polypyrrole Composite Films for Flexible Thermoelectric Generators. *Adv. Funct. Mater.* , 2022, **32**, 2106902.
4. Y. Lu, Y. -F. Ding, Y. Qiu, K. Cai, Q. Yao, H. -J. Song, L. Tang, J. -Q. He, L. -D. Chen, Good Performance and Flexible PEDOT:PSS/Cu<sub>2</sub>Se Nanowire Thermoelectric Composite Films, *ACS Appl. Electron. Mater.* **2019**, 11, 12819-12829.
5. L. Wang, Q. Yao, W. Shi, S. Qu, and L. Chen, Engineering Carrier Scattering at the Interfaces in Polyaniline Based Nanocomposites for High Thermoelectric Performances. *Mater. Chem. Front.*, 2017, **1**, 741-748.
6. Shang, H. et al. Bi<sub>0.5</sub>Sb<sub>1.5</sub>Te<sub>3</sub>-Based Films for Flexible Thermoelectric Devices. *J. Mater. Chem. A*, 2020, **8**, 4552-4561.
7. G. Kresse, and J. Furthmuller, Efficiency of ab-initio total energy calculations for metals and semiconductors using a plane-wave basis set, *Comp. Mater. Sci.*, 1996, **6**, 15-50.
8. G. Kresse, and J. Furthmuller, Efficient iterative schemes for ab initio total-energy calculations using a plane-wave basis set, *Physical Review B*, 1996, **54**, 11169-11186.
9. G. Kresse, Hafner, and J. Hafner, Ab initio molecular-dynamics for liquid-metals,

*Phys. Rev. B*, 1993, **47**, 558-561.

10. G. Kresse, and D. Joubert, From ultrasoft pseudopotentials to the projector augmented-wave method, *Phys. Rev. B*, 1999, **59**, 1758-1775.

11. J. -P. Perdew, K. Burke, and M. Ernzerhof, Generalized Gradient Approximation Made Simple, *Phys. Rev. Lett.*, 1996, **77**, 3865.

12. J. -P. Perdew, K. Burke, and M. Ernzerhof, Erratum: generalized gradient approximation made simple, *Phys. Rev. Lett.*, 1997, **78**, 1396-1396.

13. Y. Xu, W. Li, C. Wang, J. Li, Z. Chen, S. Lin, Y. Chen and Y. Pei, Performance optimization and single parabolic band behavior of thermoelectric MnTe, *J. Mater. Chem. A*, 2017, **5**, 19143-19150.

14. J. Shen, Z. Chen, S. lin, L. Zheng, W. Li and Y. Pei, Single parabolic band behavior of thermoelectric p-type CuGaTe<sub>2</sub>, *J. Mater. Chem. C*, 2016, **4**, 209-214.

15. X. She, X. Su, H. Du, T. Liang, G. Zheng, Y. Yan, R. Akram, C. Uher and X. Tang, High thermoelectric performance of higher manganese silicides prepared by ultra-fast thermal explosion, *J. Mater. Chem. C*, 2015, **3**, 12116-12122.

16. W. Liu, X. Shi, M. Hong, L. Yang, R. Moshwan, Z. G. Chen and J. Zou, *J. Mater. Chem. C*, 2018, **6**, 13225.

17. S. Y. Wang, X. Y. She, G. Zheng, F. Fu, H. Li, and X. F. Tang, Enhanced Thermoelectric Performance and Thermal Stability in  $\beta$ -Zn<sub>4</sub>Sb<sub>3</sub> by Slight Pb-Doping, *Journal of Electronic Materials*, 2012, **41**, 1091-1099.
